# Supplementary material for: Host preference of field-derived Schistosoma mansoni is influenced by snail host compatibility and infection status
Source: PubMed Central journal article supplement (PMC9592064; doi:10.1002/ecs2.4004), 2022-04-08
Supplement: NIHMS1841778-supplement-Appendix_s1.pdf [file NIHMS1841778-supplement-Appendix_s1.pdf]

## Ecosphere

Host preference of field-derived *Schistosoma mansoni* is influenced by  
snail host compatibility and infection status

Martina R. Laidemitt, Alyssa M. Gleichsner, Christopher D. Ingram, Steven D. Gay,

Elizabeth M. Reinhart, Martin W. Mutuku, Polycup Oraro, Dennis J. Minchella,

Gerald M. Mkoji, Eric S. Loker, and Michelle L. Steinauer

## Appendix S1

Table S1. Allopatric vs. sympatric 2019 data. Bp vs. Bs

| Treatment             | Estimate | Std. Error | Z value | P value      | Result                                               |
|-----------------------|----------|------------|---------|--------------|------------------------------------------------------|
| Intercept             | -0.039   | 0.163      | -0.244  | 0.807        |                                                      |
| Asao Miracidia        | -0.488   | 0.214      | -2.278  | <b>0.023</b> | <b>Asao miracidia significantly choose Bp snails</b> |
| Kanyibok<br>Miracidia | 0.115    | 0.253      | 0.454   | 0.649        | NS                                                   |

Table S2. Allopatric vs. sympatric 2017 data. Bp vs. Bs.

| <b>Treatment</b>              | <b>Estimate</b> | <b>Std. Error</b> | <b>Z value</b> | <b>P value</b> | <b>Result</b> |
|-------------------------------|-----------------|-------------------|----------------|----------------|---------------|
| Intercept                     | -0.039          | 0.163             | -0.244         | 0.807          |               |
| Asao Miracidia                | 0.222           | 0.219             | 1.013          | 0.311          | No difference |
| Kisumu (Carwash)<br>Miracidia | -0.109          | 0.219             | -0.500         | 0.617          | No difference |
